# Supplementary material
Source: publisher figshare collection journal article supplement (https://tandf.figshare.com/articles/dataset/_/11987478)

## Supplementary A

SEM-EDS montage maps of the thirteen beach sands analysed. Green indicates Zr and red indicates Ti.

### Camerons

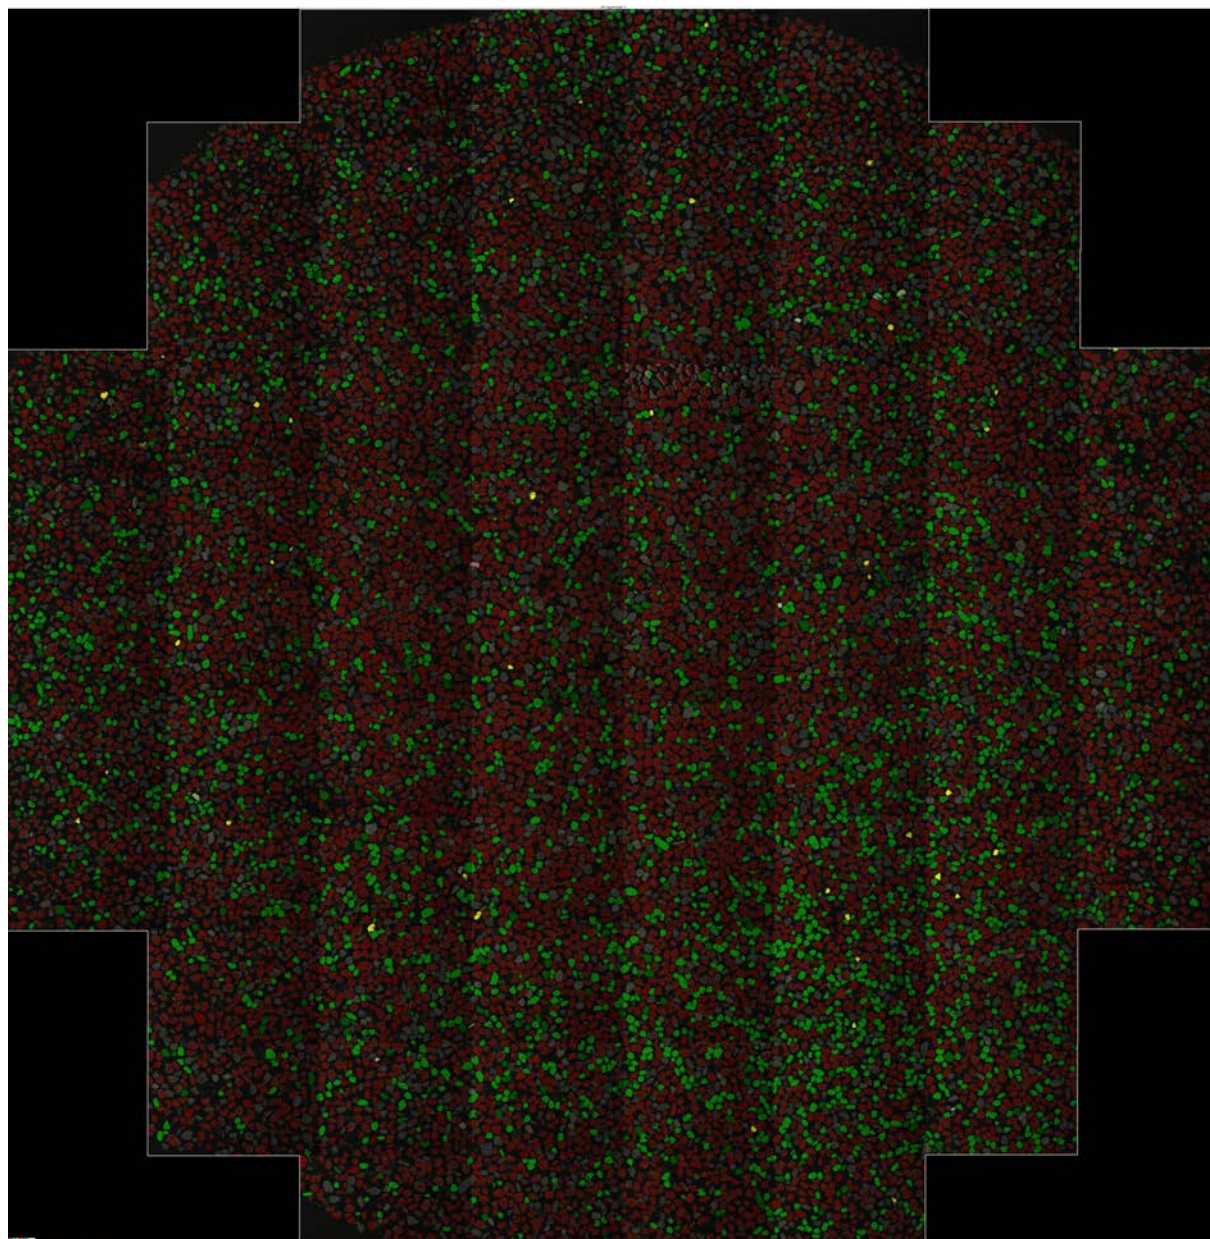

## Greymouth

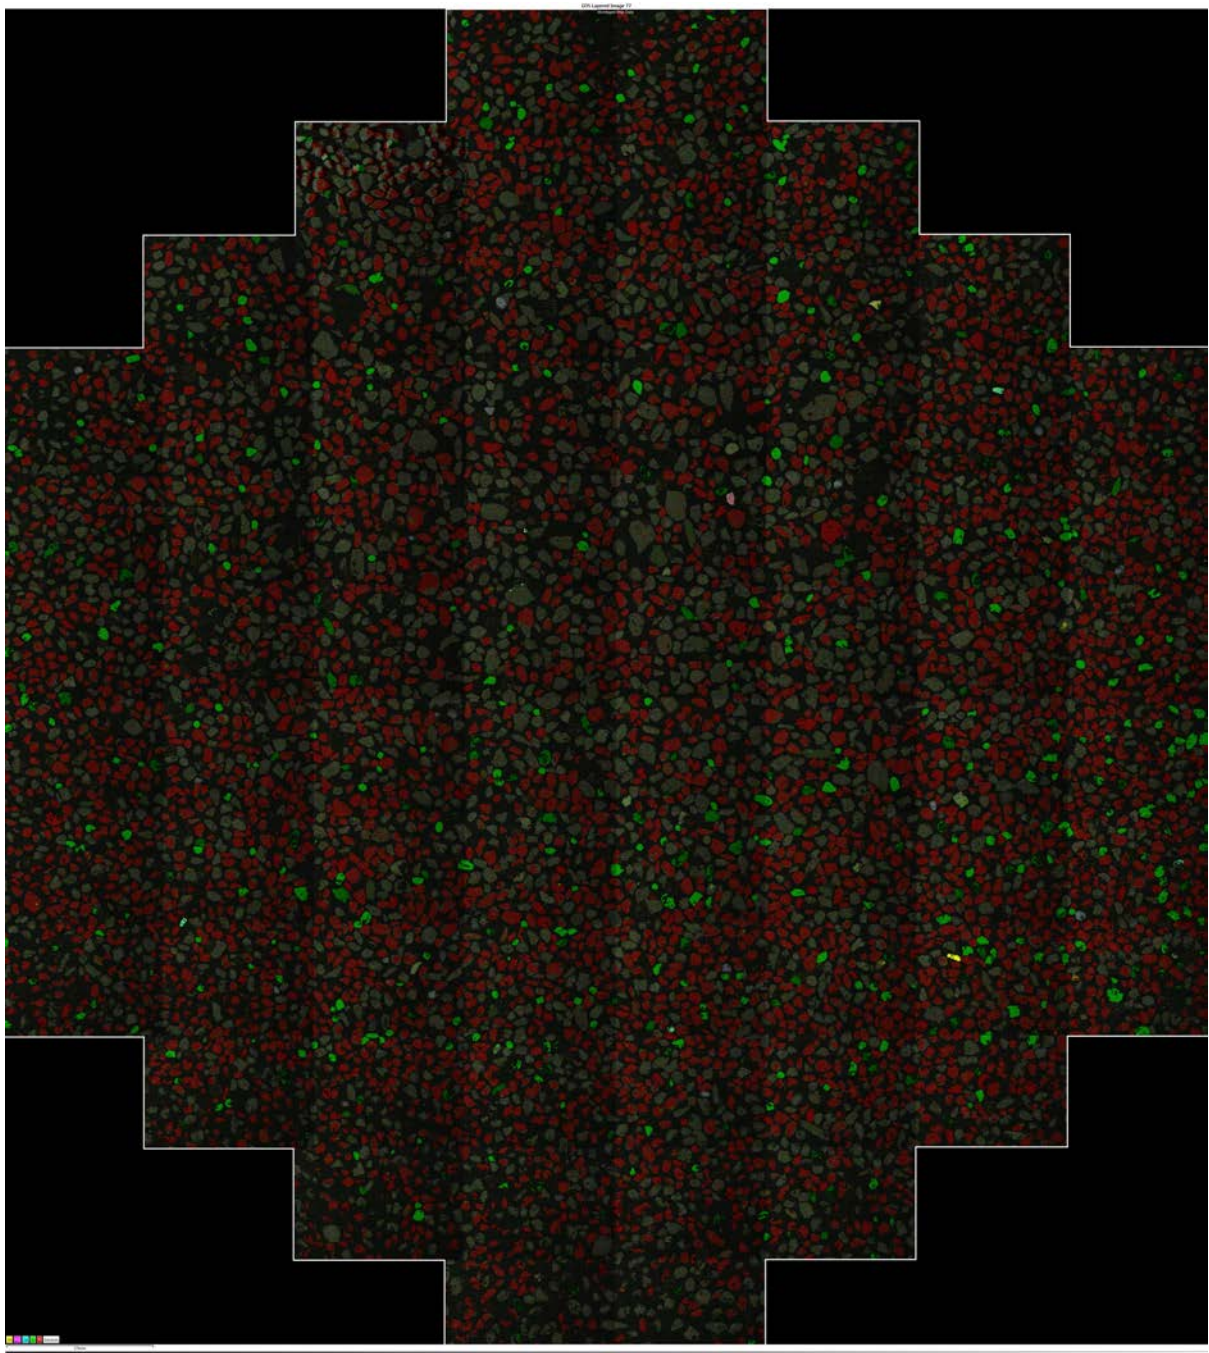



## Rapahoe

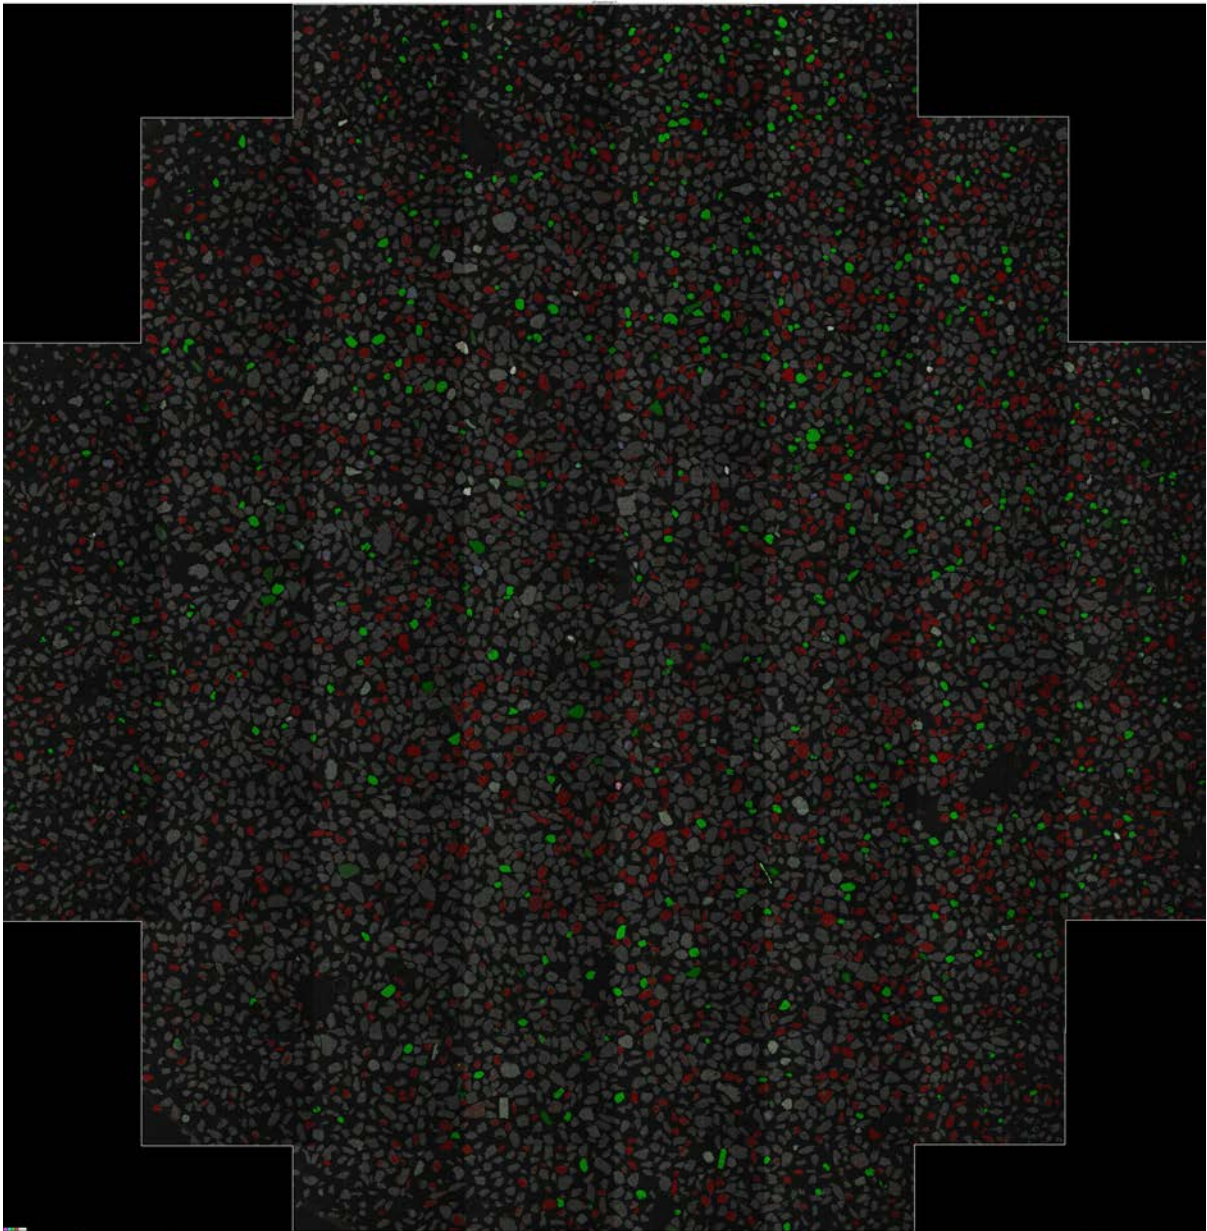



## Barrytown

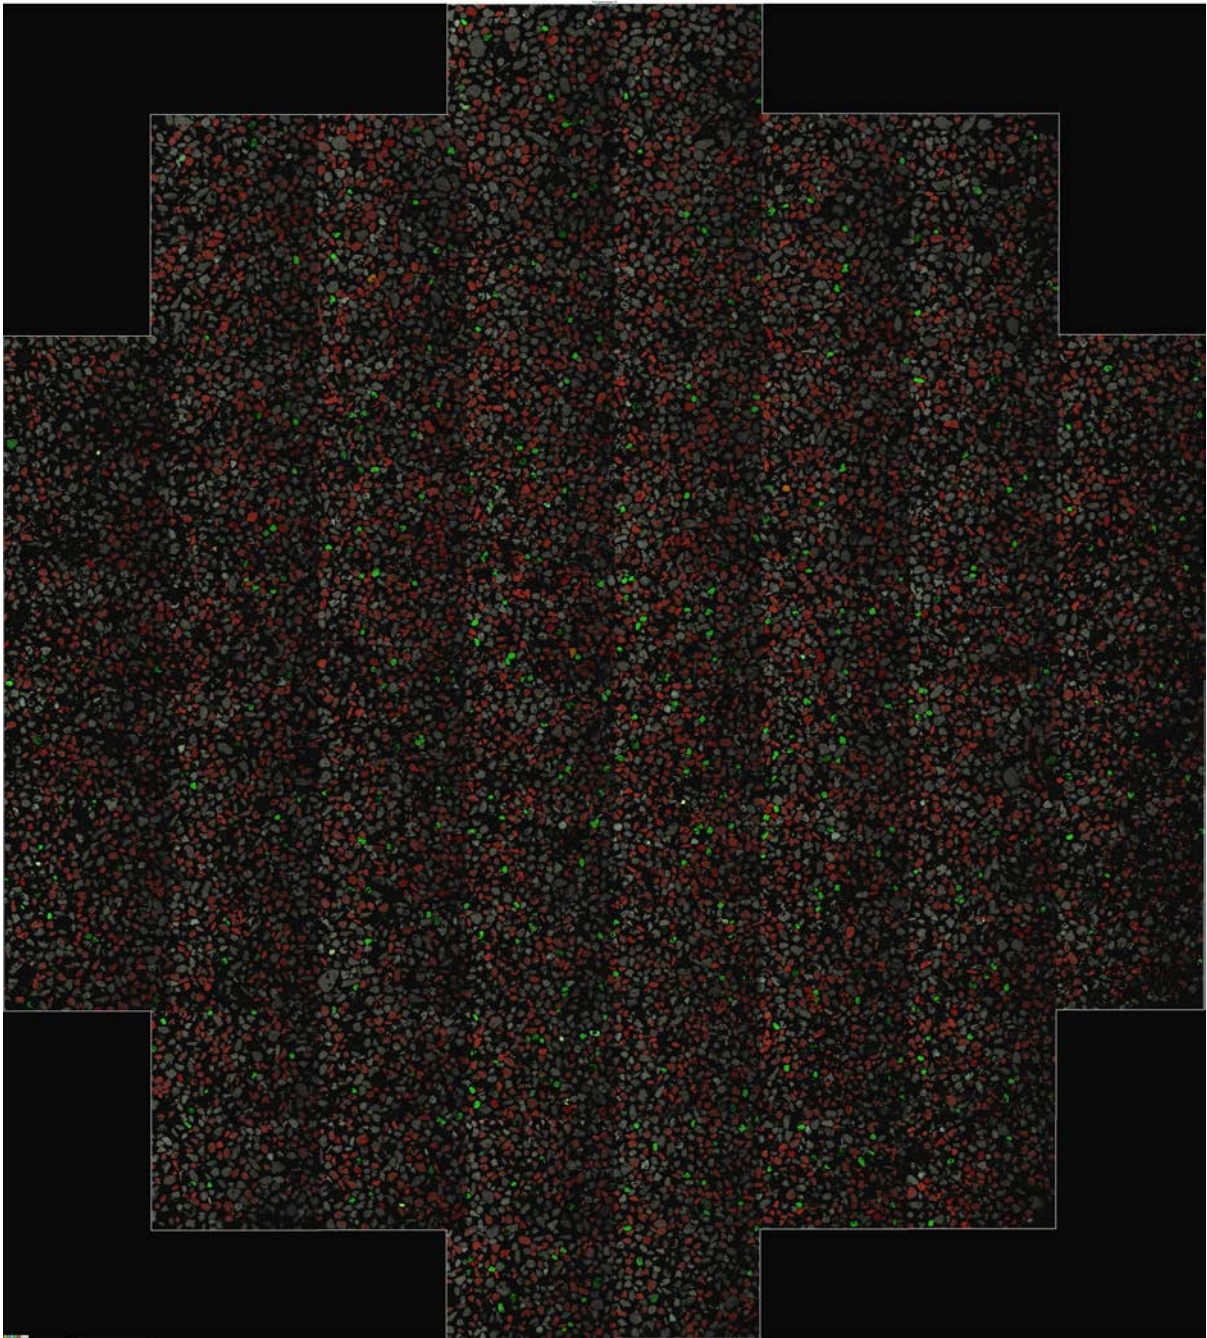



## Punakaiki

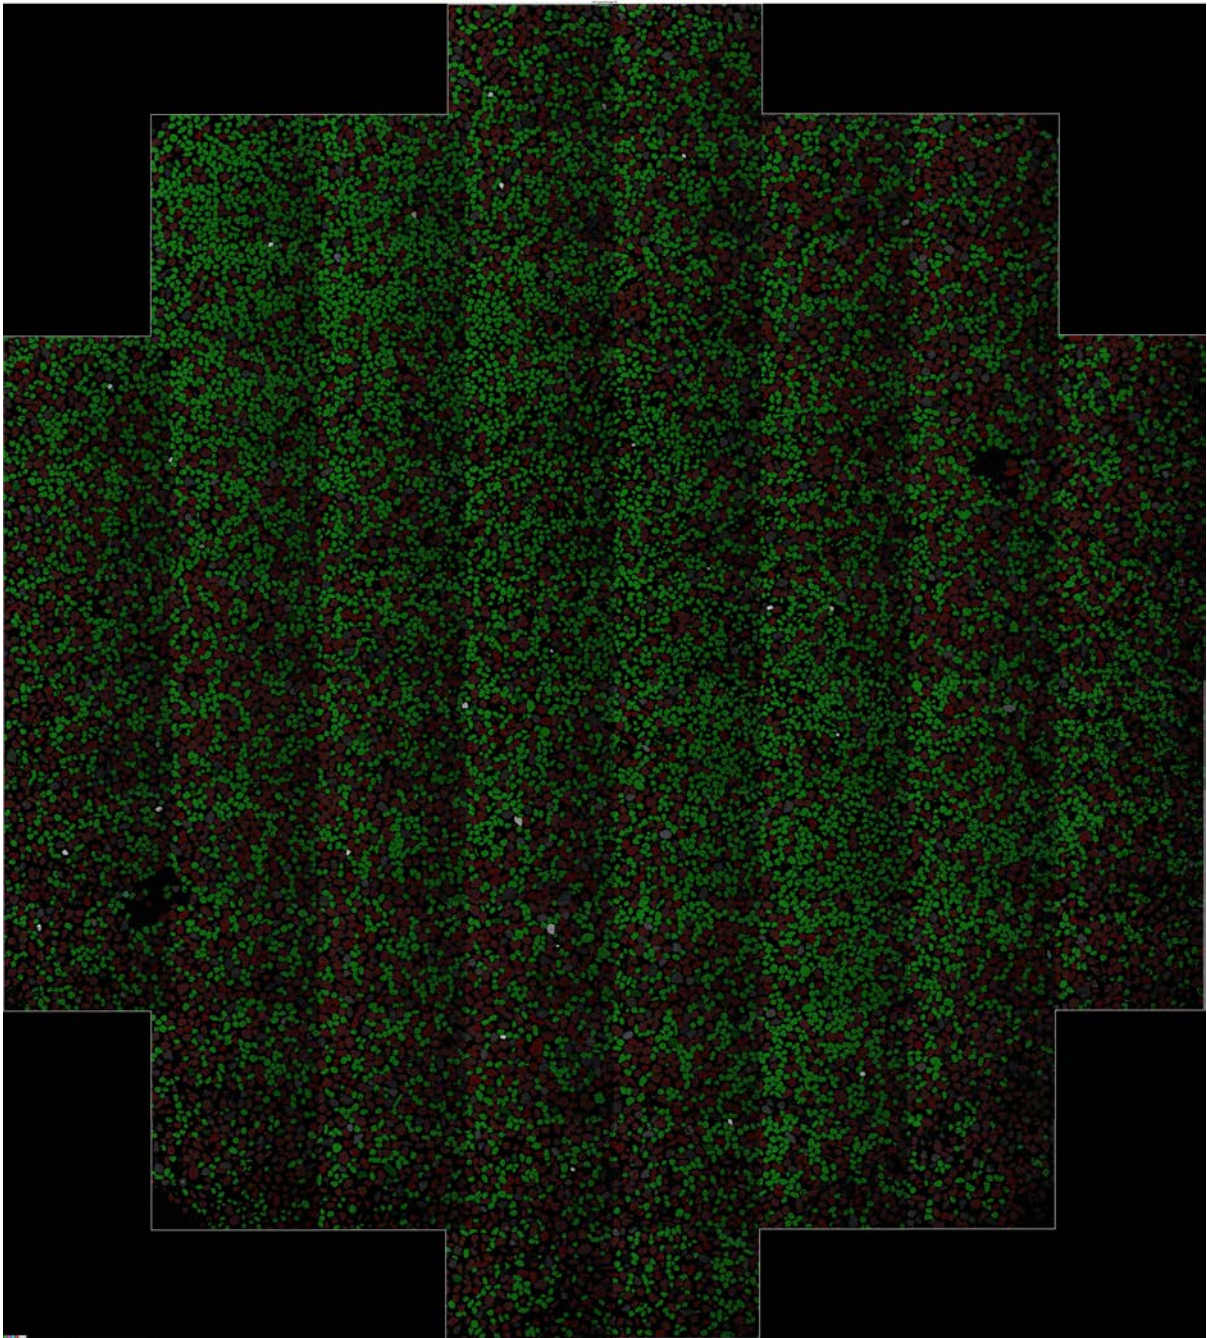

## Fox River

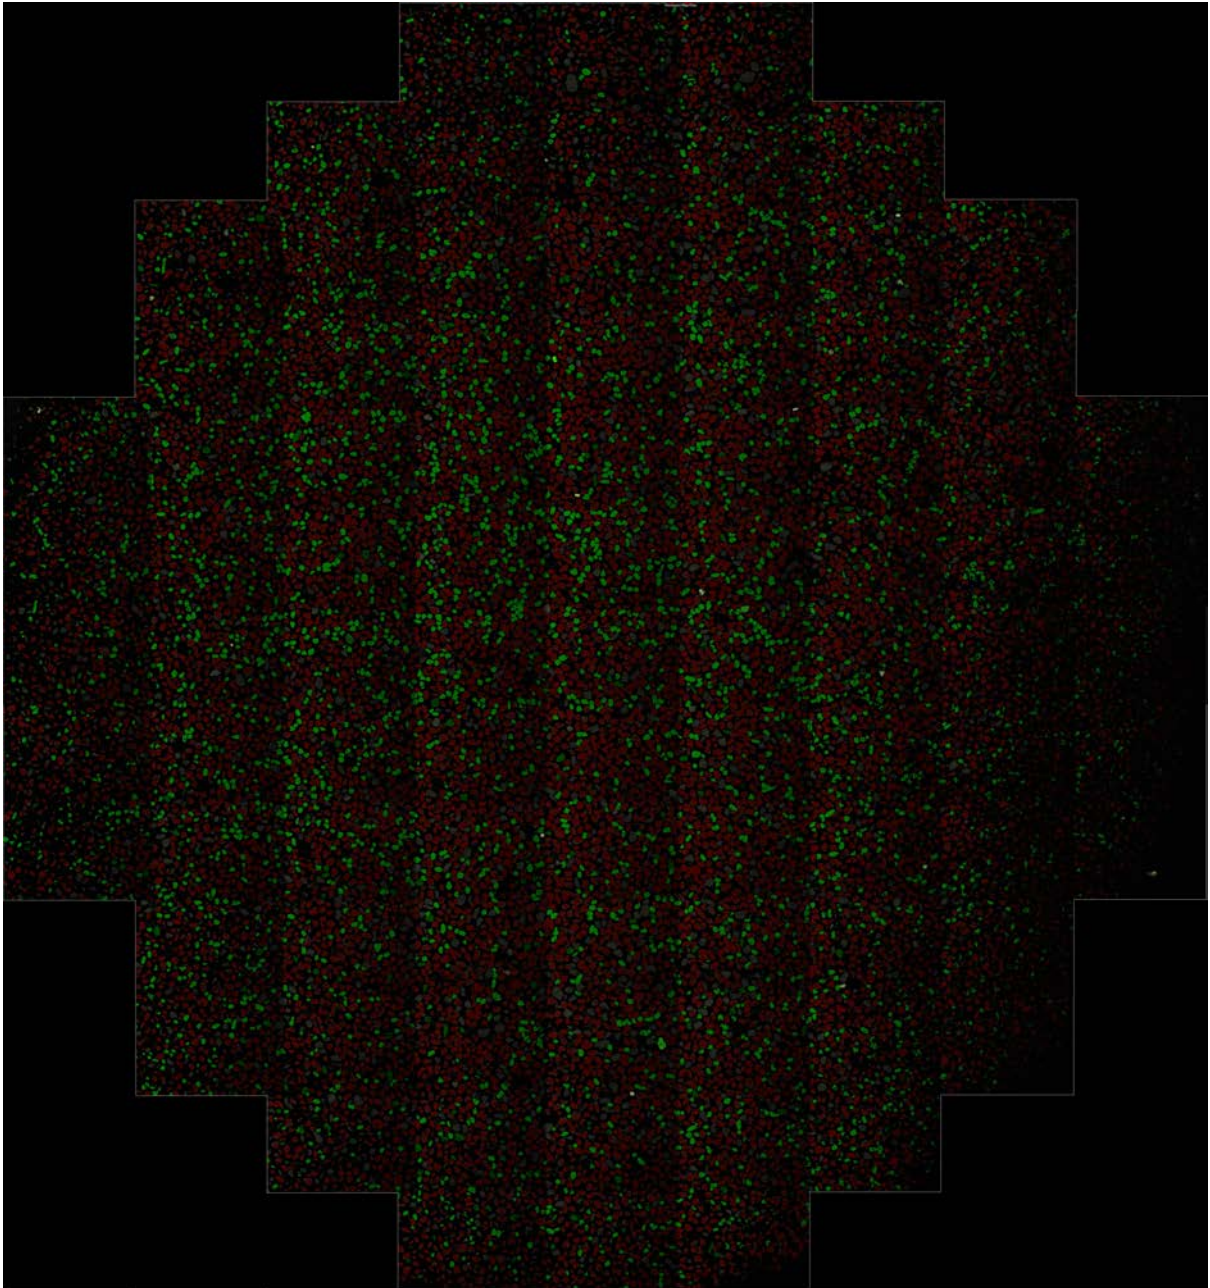



## Nine Mile

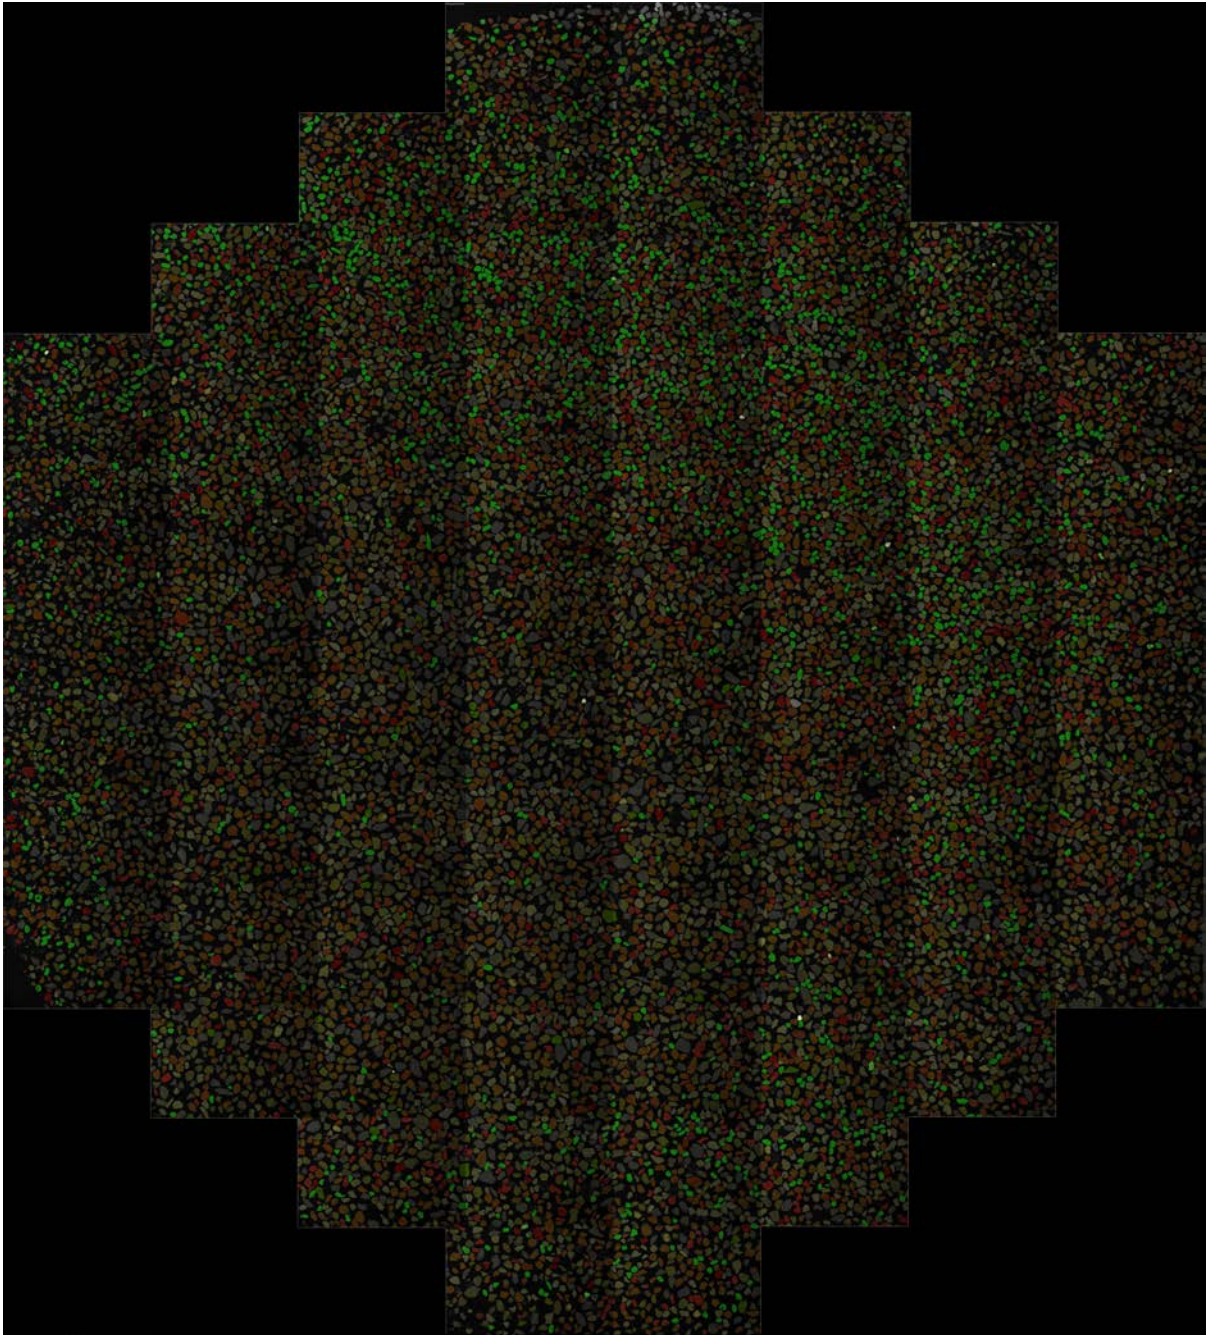



## Carters

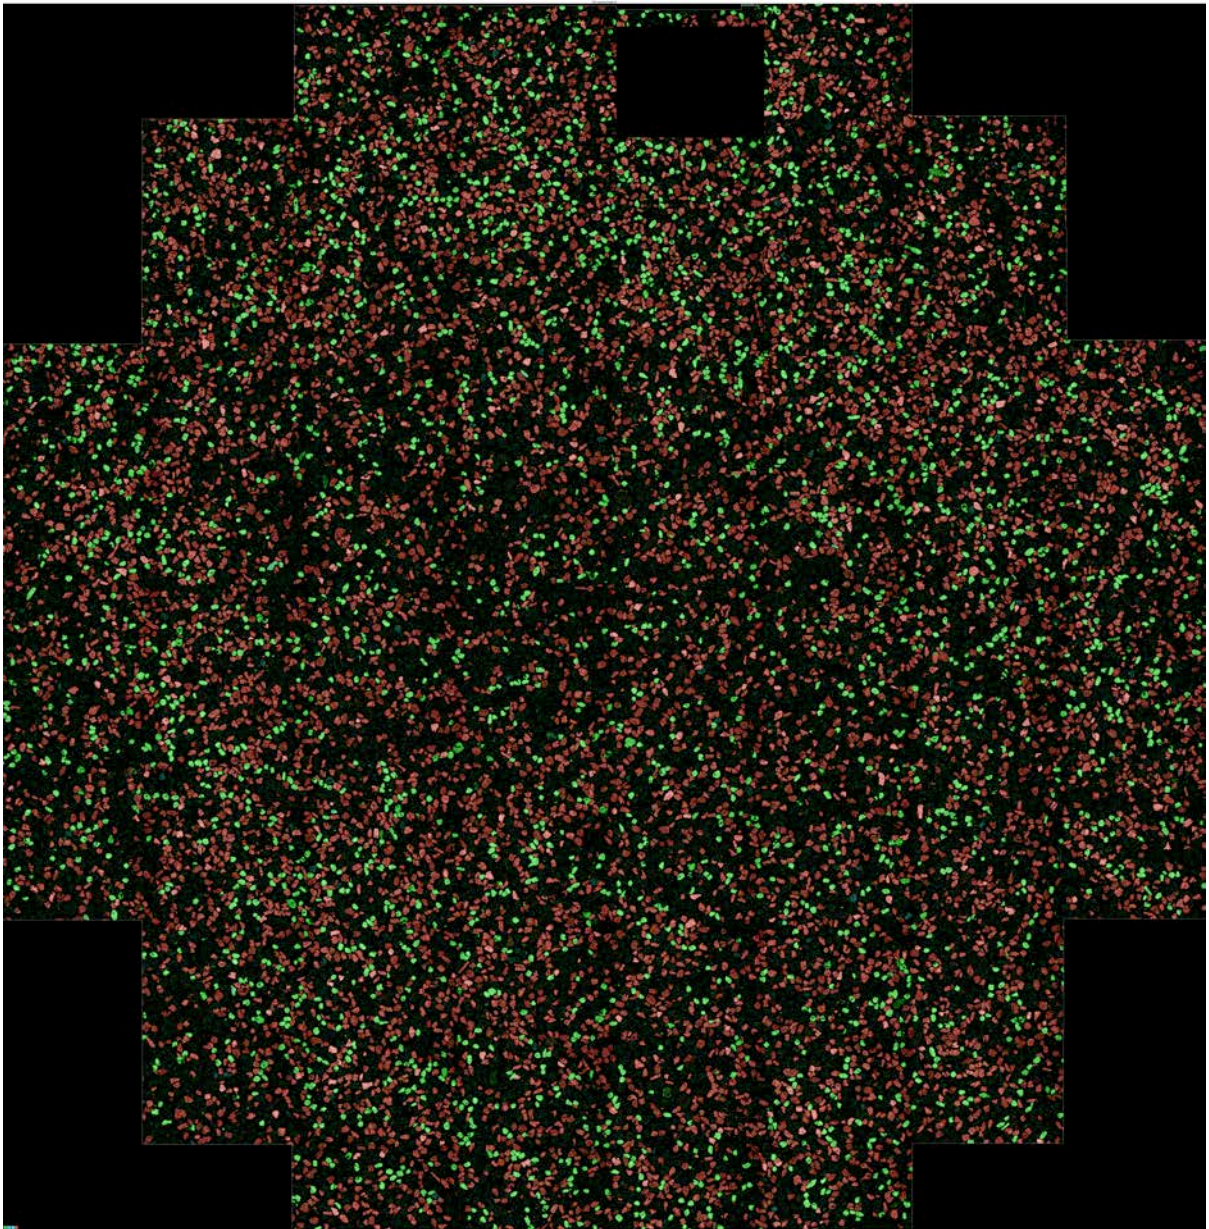



## Westport

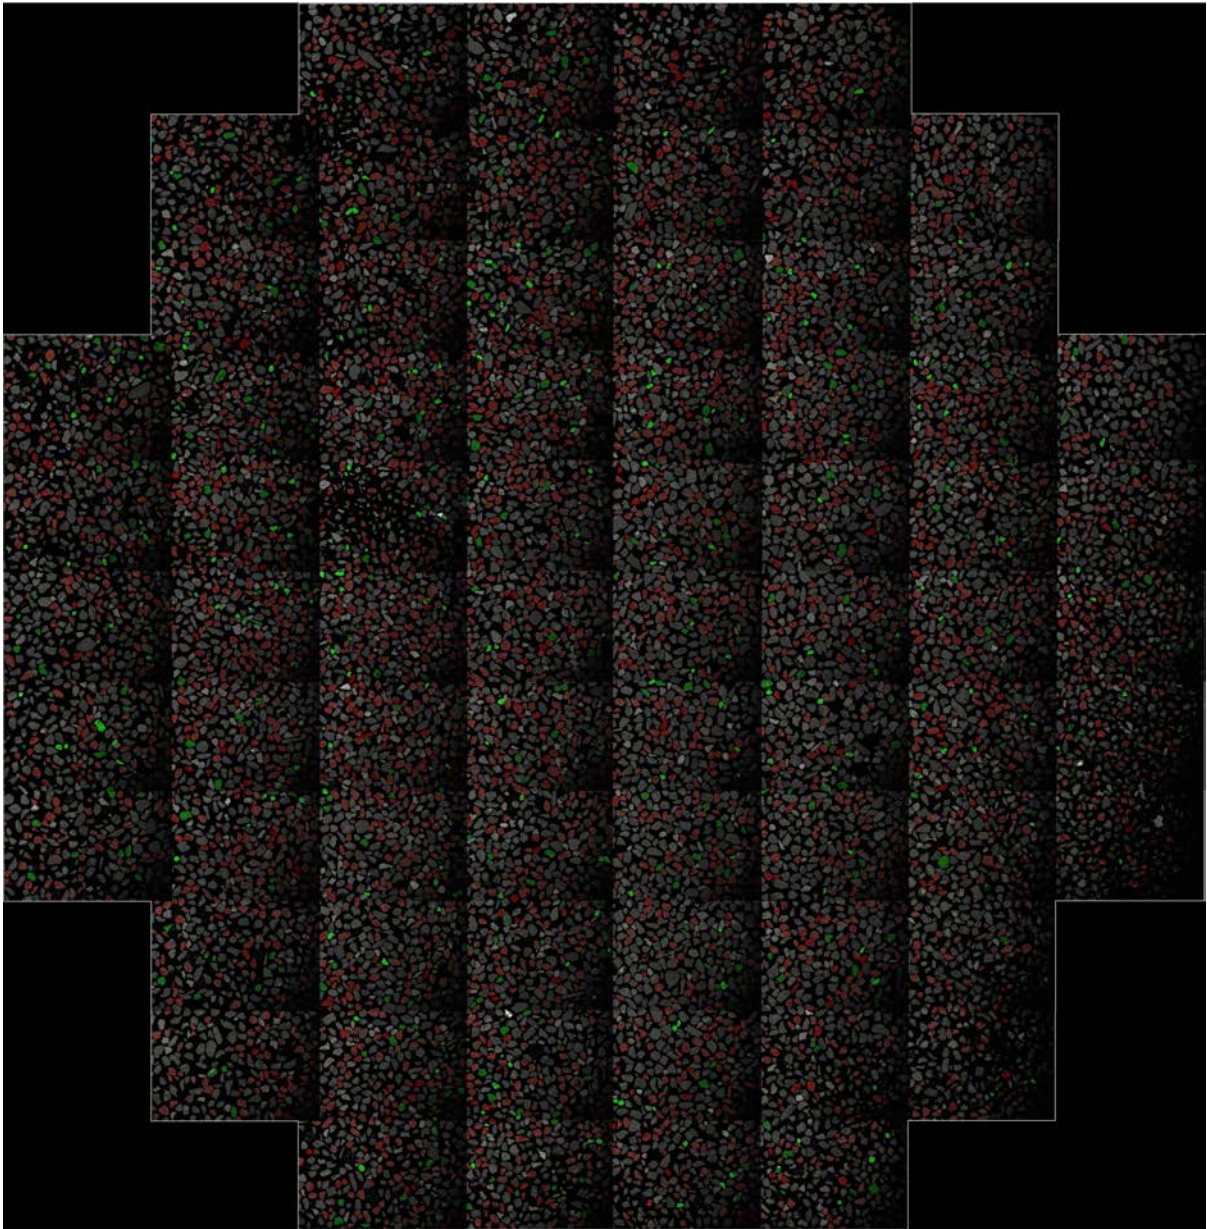



## Waimangaroa

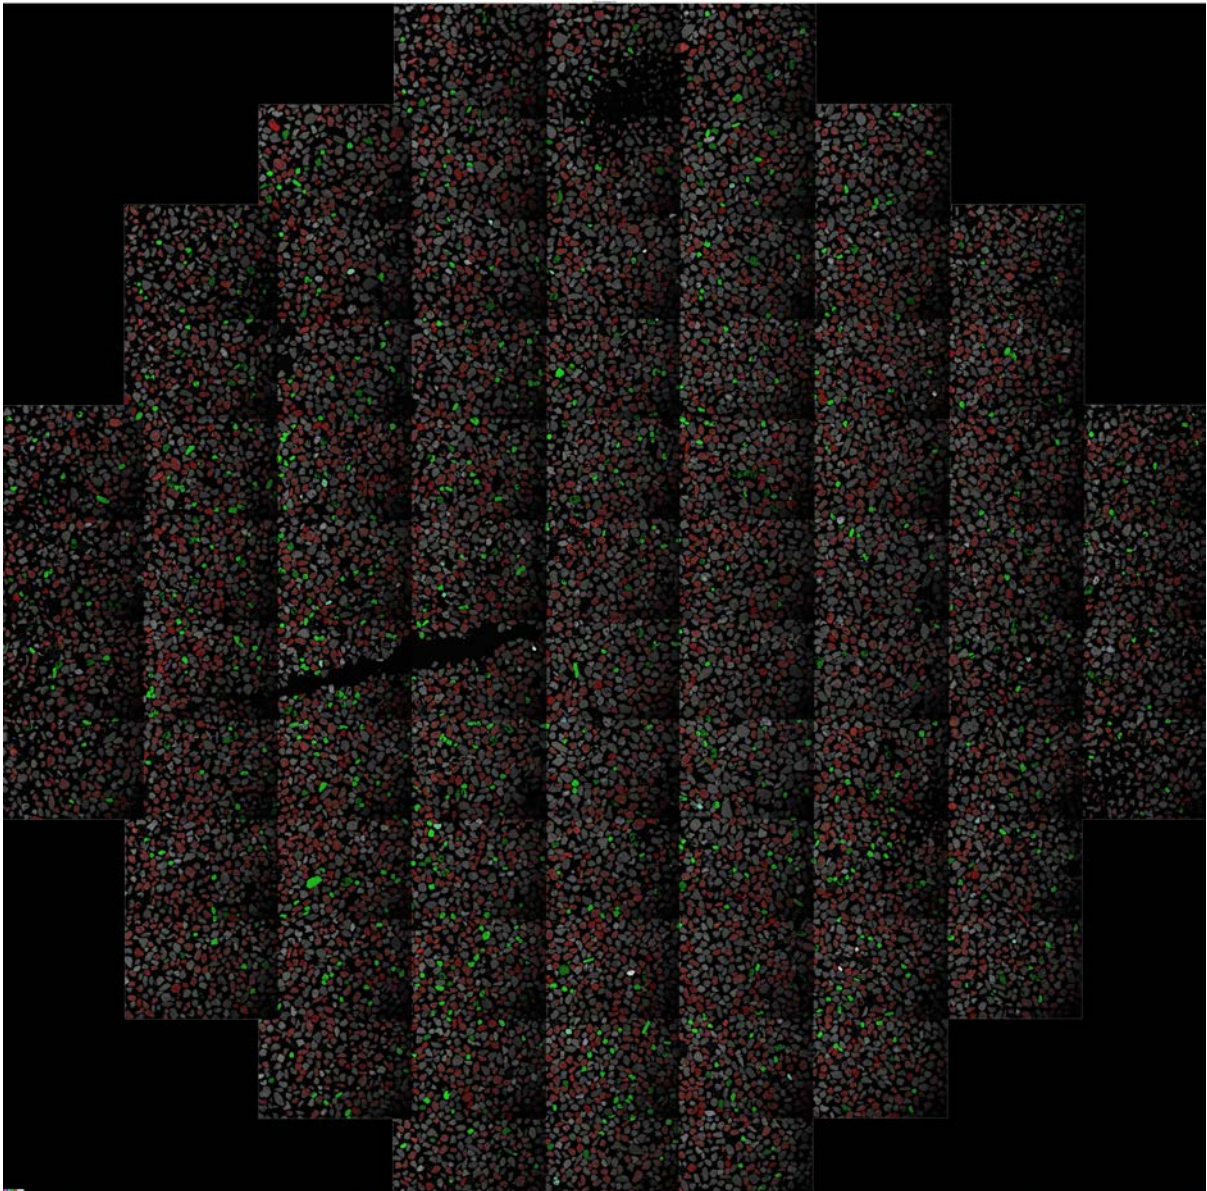



## Hector

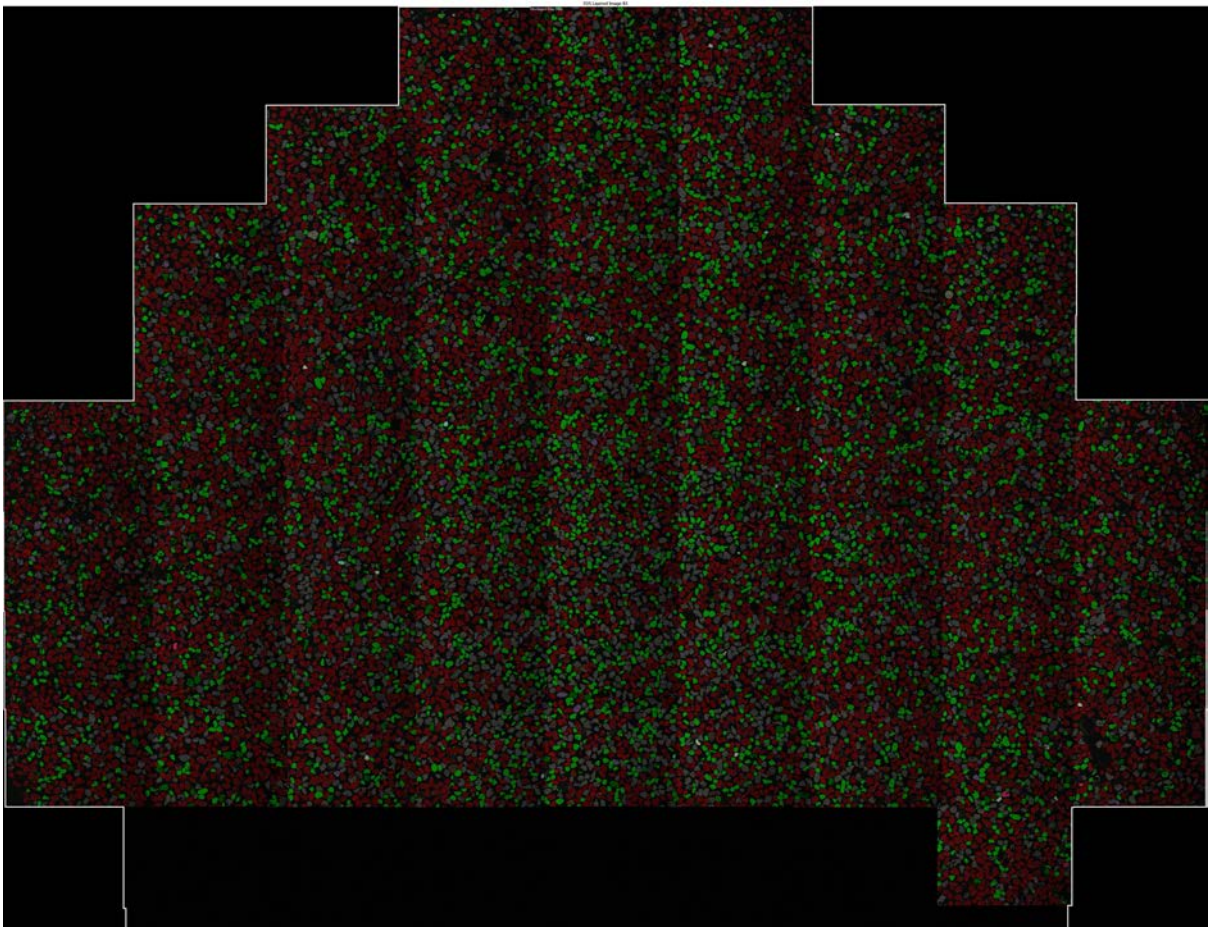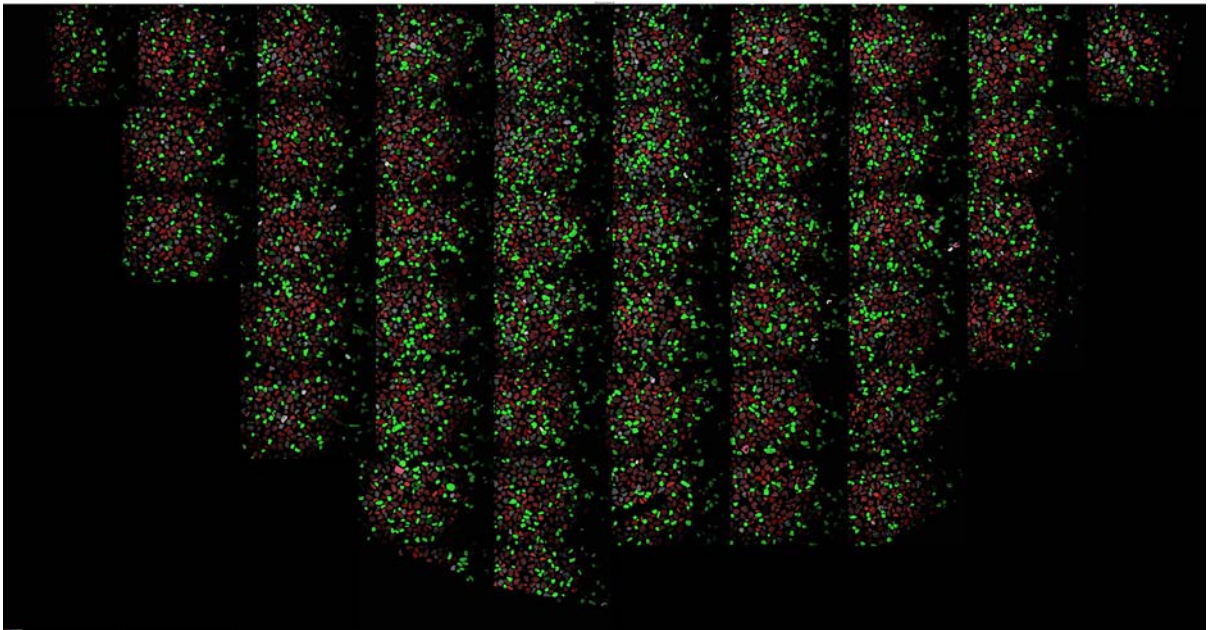



## Little Wanganui

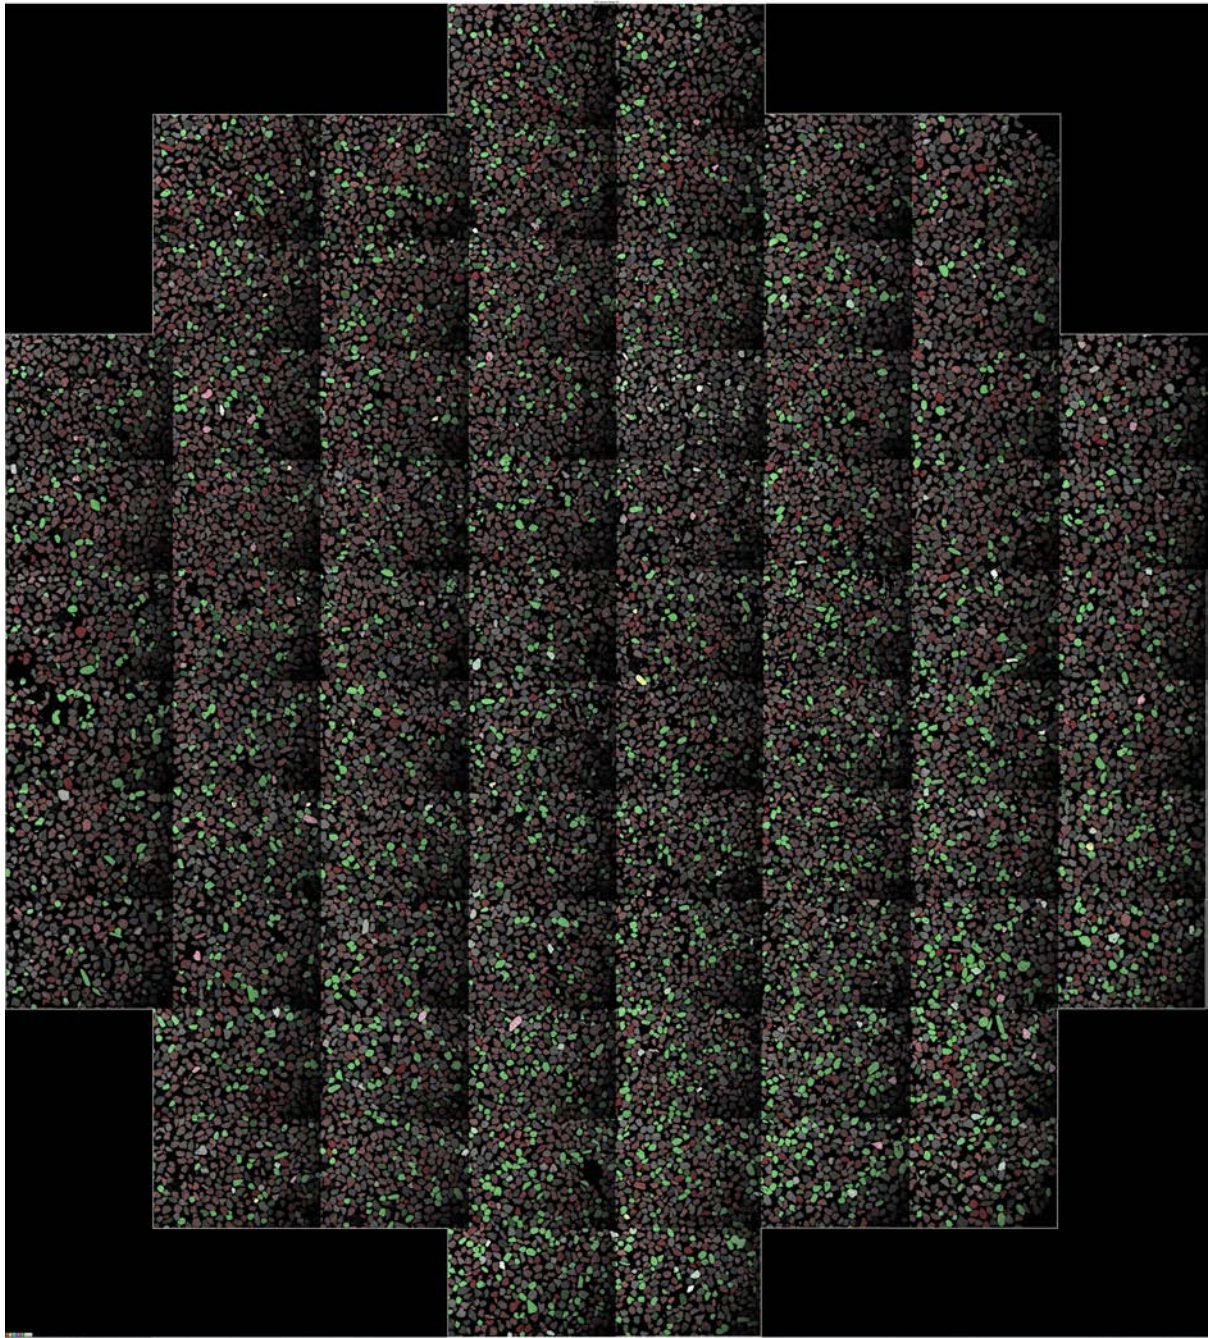



## Karamea

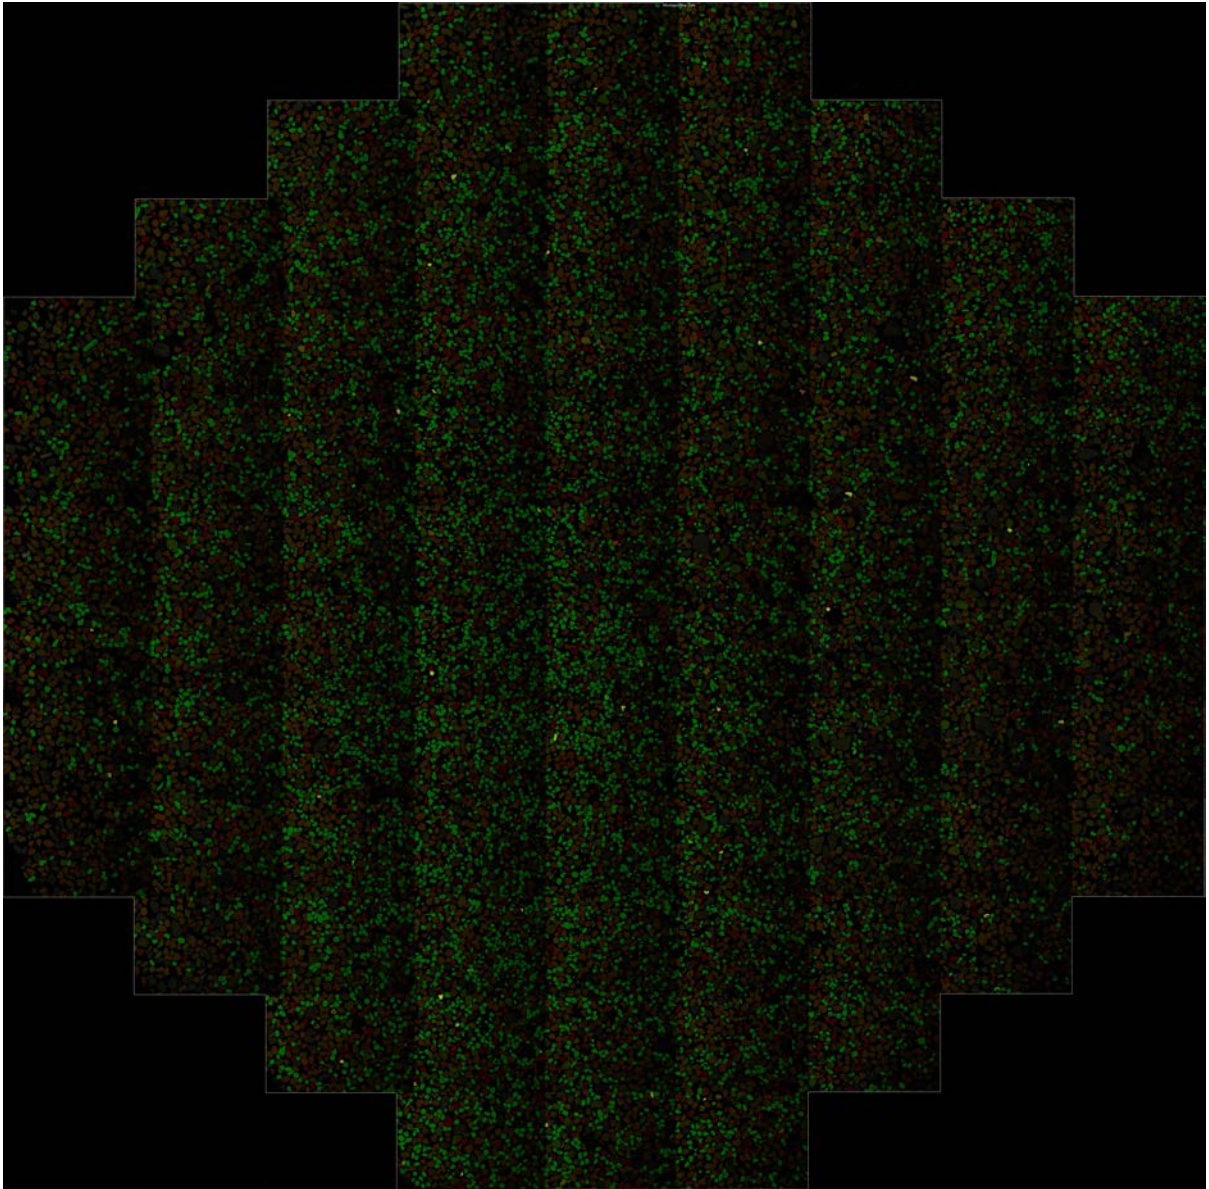

Supplement: Supplementary file 2 [file 1]
